# Supplementary material
Source: Springer Nature journal article supplement (https://www.springermedizin.de/resource/supplementary/13633_2014_350_MOESM1_ESM.pdf/9596174)

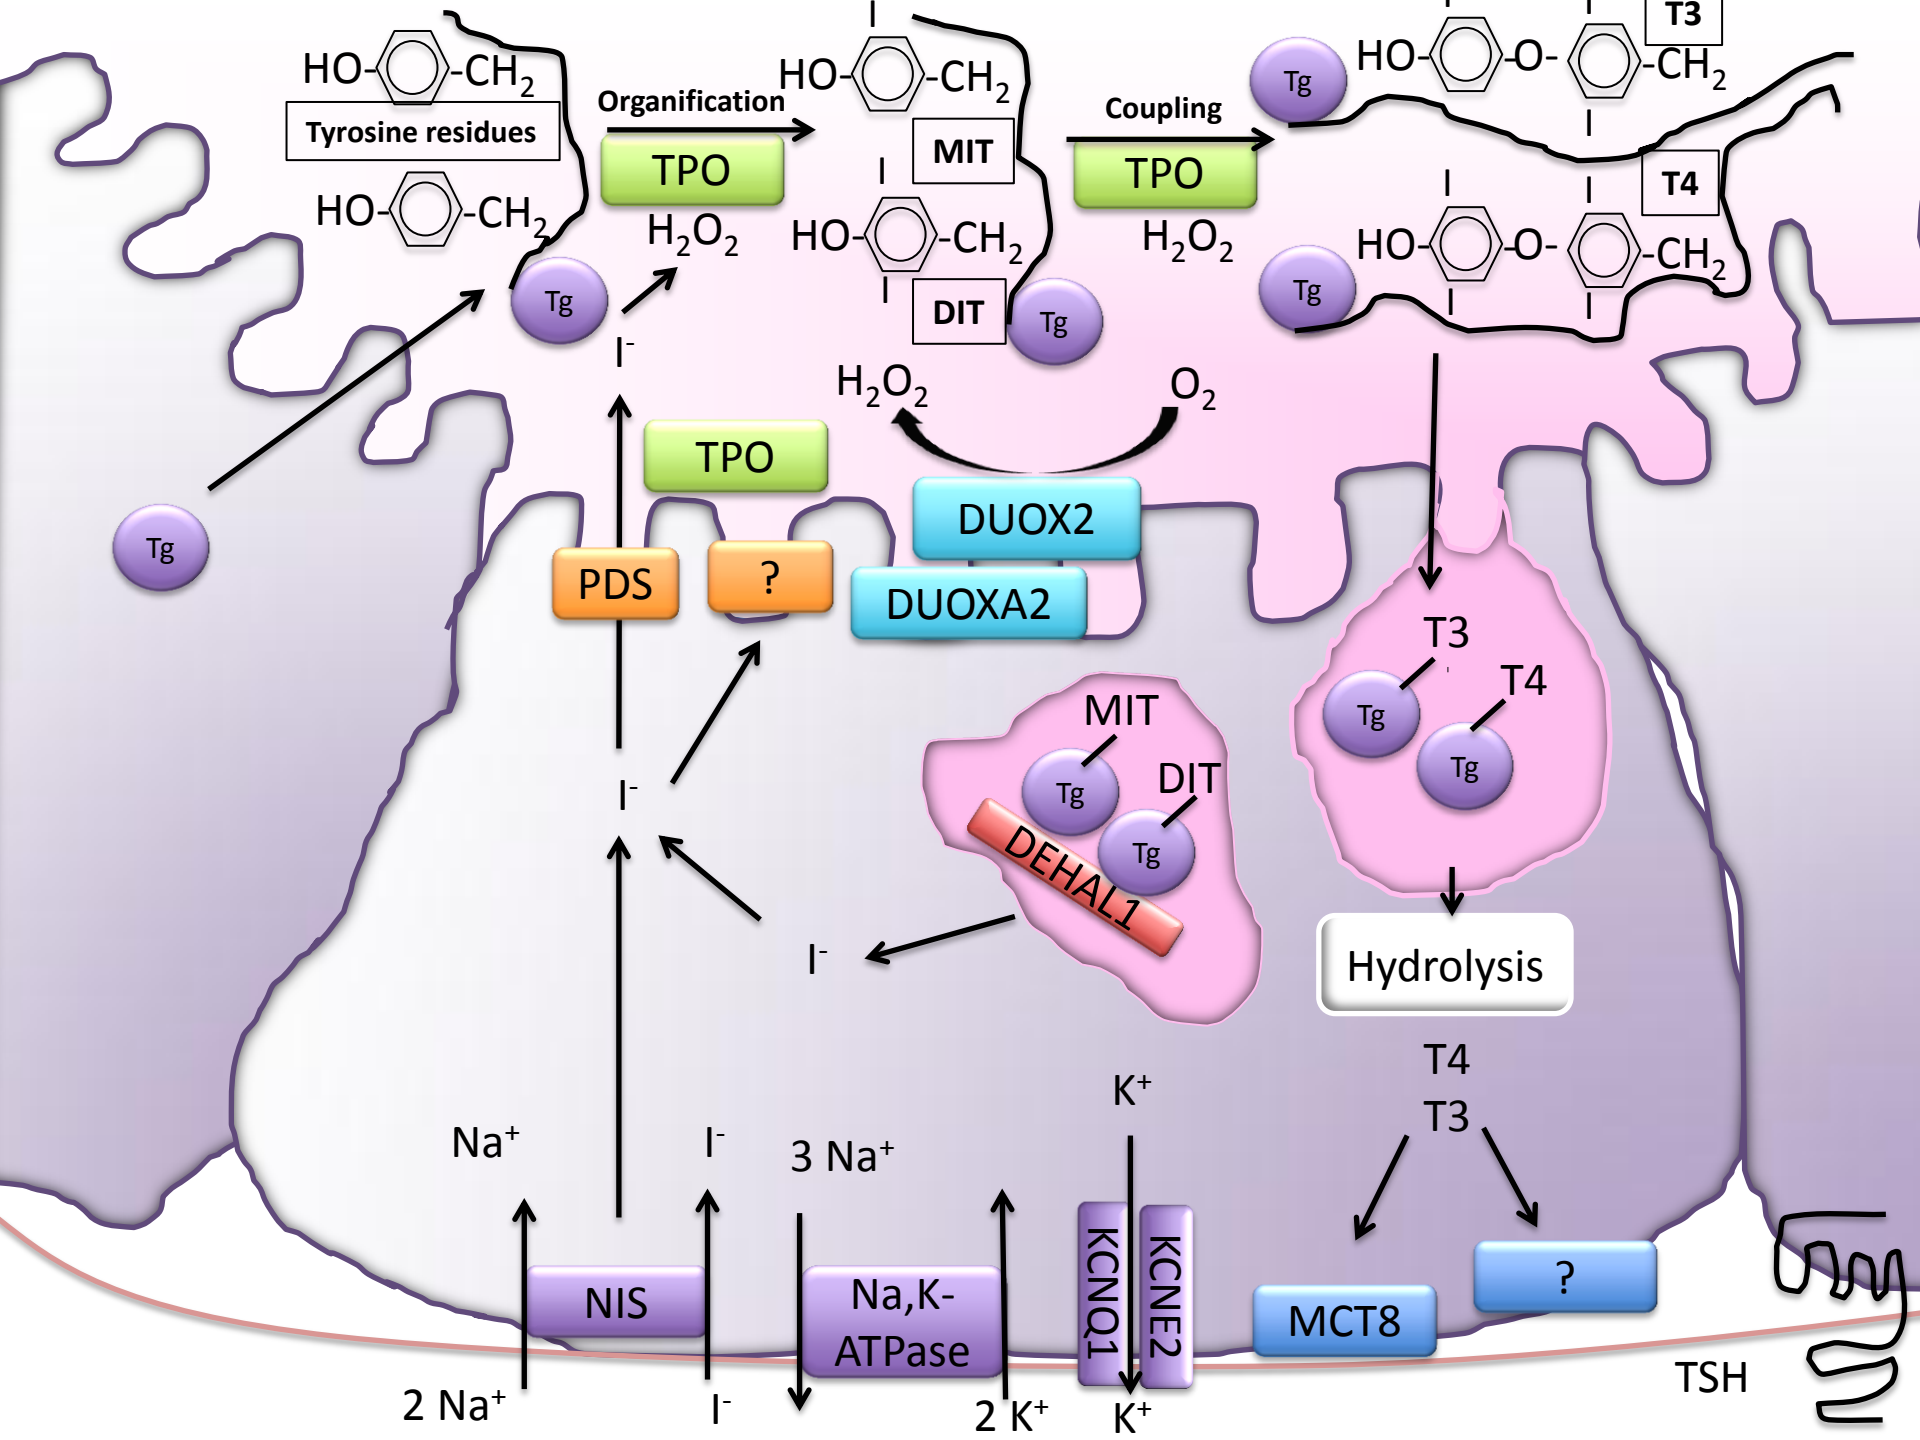

Supplement: MOESM1 [file 9596174]
